# Supplementary material for: New Insights into Mitochondrial–Nuclear Interactions Revealed through Analysis of Small RNAs
Source: PubMed Central journal article supplement — Genome Biol Evol. 2022 Feb 10;14(2):evac023. doi: 10.1093/gbe/evac023 (PMC8883506; doi:10.1093/gbe/evac023), 2022-02-10

| Type of resource                                                    | Source                                          | ID                                                                                                                                                              |
|---------------------------------------------------------------------|-------------------------------------------------|-----------------------------------------------------------------------------------------------------------------------------------------------------------------|
| <b>Deposited Data</b>                                               |                                                 |                                                                                                                                                                 |
| Human brain tissues (BA9)                                           | Hoss AG. <i>et al.</i> 2015                     | PRJNA272617                                                                                                                                                     |
| Human liver tissues (CHC)                                           | Butt AM. <i>et al.</i> 2016                     | PRJNA347838                                                                                                                                                     |
| HeLa cell culture                                                   | Zhang K. <i>et al.</i> 2018                     | PRJNA473925                                                                                                                                                     |
| Neuronal progenitor human cell culture                              | Young-Soo Kwon                                  | PRJNA438936                                                                                                                                                     |
| teratoma-derived fibroblast human cell culture                      | Young-Soo Kwon                                  | PRJNA438936                                                                                                                                                     |
| Mouse brain tissues                                                 | Viljetic B. <i>et al.</i> 2017                  | PRJNA309689                                                                                                                                                     |
| Mouse liver tissues                                                 | Jee D. <i>et al.</i> 2018                       | PRJNA395699                                                                                                                                                     |
| Mouse embryonic stem cell culture (mESC)                            | Zamudio JR. <i>et al.</i> 2014                  | PRJNA218026                                                                                                                                                     |
| Mouse kidney tissues                                                | Woo YM. <i>et al.</i> 2017                      | PRJNA342099                                                                                                                                                     |
| Chicken brain and liver tissues                                     | Warnefors M. <i>et al.</i> 2017                 | PRJNA396511                                                                                                                                                     |
| Zebrafish brain and liver tissues                                   | Vaz C. <i>et al.</i> 2015                       | PRJNA245824                                                                                                                                                     |
| Huh7.5 human hepatoma cell culture                                  | Moore MJ. <i>et al.</i> 2015                    | PRJNA296130                                                                                                                                                     |
| N2A mouse neuroblastoma cell culture                                | Moore MJ. <i>et al.</i> 2015                    | PRJNA296129                                                                                                                                                     |
| HCT116 cell culture                                                 | Golden RJ. <i>et al.</i> 2017                   | PRJNA354540                                                                                                                                                     |
| HeLa cell culture (Ago2-KOs)                                        | Schuster S. <i>et al.</i> 2019                  | PRJNA550031                                                                                                                                                     |
| <b>Experimental Models: Cell Lines</b>                              |                                                 |                                                                                                                                                                 |
| HeLa cell culture                                                   | Xiang-Dong Fu                                   | GSM3168220                                                                                                                                                      |
| Neuronal progenitor human cell culture                              | Young-Soo Kwon                                  | GSM3052811                                                                                                                                                      |
| teratoma-derived fibroblast human cell culture                      | Young-Soo Kwon                                  | GSM3052815                                                                                                                                                      |
| Mouse embryonic stem cell culture (mESC)                            | Jesse R Zamudio                                 | GSM1224442                                                                                                                                                      |
| Huh7.5 human hepatoma cell culture                                  | Moore MJ. <i>et al.</i> 2015                    | PRJNA296130                                                                                                                                                     |
| N2A mouse neuroblastoma cell culture                                | Moore MJ. <i>et al.</i> 2015                    | PRJNA296129                                                                                                                                                     |
| HCT116 human cell culture                                           | Golden RJ. <i>et al.</i> 2017                   | GSE89942                                                                                                                                                        |
| HeLa cell culture (Ago2-KOs)                                        | Schuster S. <i>et al.</i> 2019                  | PRJNA550031                                                                                                                                                     |
| <b>Experimental Models: Organisms/Strains</b>                       |                                                 |                                                                                                                                                                 |
| Mouse Brain tissues from mix of strains 129 and C57BL/6             | The Jackson laboratory                          | No:002448<br>No:000664                                                                                                                                          |
| Mouse liver tissues from strain B6.Cg-Tg(Vav1-icre)A2Kio/J vav1-cre | The Jackson laboratory                          | No:008610                                                                                                                                                       |
| kidney tissues from mice with floxed Pkd1                           | Stefan Somlo                                    | NA                                                                                                                                                              |
| Chicken brain and liver tissues                                     | Peter Jensen                                    | NA                                                                                                                                                              |
| Zebrafish brain and liver tissues from Singapore strain             | Obtained from individuals in the original study | NA                                                                                                                                                              |
| <b>Software and Algorithms</b>                                      |                                                 |                                                                                                                                                                 |
| BowTie2                                                             | Langmead and Salzberg 2012                      | <a href="http://bowtie-bio.sourceforge.net/bowtie2/index.shtml">http://bowtie-bio.sourceforge.net/bowtie2/index.shtml</a>                                       |
| Bedtool                                                             | Quinlan and Hall 2010                           | <a href="https://bedtools.readthedocs.io/en/latest/">https://bedtools.readthedocs.io/en/latest/</a>                                                             |
| Ncbi Blast                                                          | Altschul <i>et al.</i> 1997                     | <a href="https://blast.ncbi.nlm.nih.gov/Blast.cgi?CMD=Web&amp;PAGE_TYPE=BlastHome">https://blast.ncbi.nlm.nih.gov/Blast.cgi?CMD=Web&amp;PAGE_TYPE=BlastHome</a> |
| R package <i>circlize</i>                                           | Gu <i>et al.</i> 2014                           | <a href="https://jokergoo.github.io/circlize_book/">https://jokergoo.github.io/circlize_book/</a>                                                               |
| MATLAB                                                              | The MathWorks, Inc.                             | <a href="https://au.mathworks.com/">https://au.mathworks.com/</a>                                                                                               |
| Vsearch                                                             | Rognes <i>et al.</i> 2016                       | <a href="https://github.com/torognes/vsearch">https://github.com/torognes/vsearch</a>                                                                           |
| RNAfold                                                             | Lorenz <i>et al.</i> 2011                       | <a href="http://rna.tbi.univie.ac.at/cgi-bin/RNAWebSuite/RNAfold.cgi">http://rna.tbi.univie.ac.at/cgi-bin/RNAWebSuite/RNAfold.cgi</a>                           |
| AliView                                                             | Larsson <i>et al.</i> 2014                      | <a href="https://ormbunkar.se/aliview/">https://ormbunkar.se/aliview/</a>                                                                                       |
| VaRNA                                                               | Darty <i>et al.</i> 2009                        | <a href="http://varna.lri.fr/">http://varna.lri.fr/</a>                                                                                                         |

## **Gene-by-gene analysis of samples treated with different concentrations of RNase I**

The **figure S1** highlights the lack of effect from different concentrations of RNase I, across multiple mitochondrial genes.

In the following figure, we show the small RNAs transcriptional signature of all the mitochondrial genes, divided by gene. The genes order is protein-coding, rRNAs, tRNAs, and within each group, the genes are in alphabetic order.

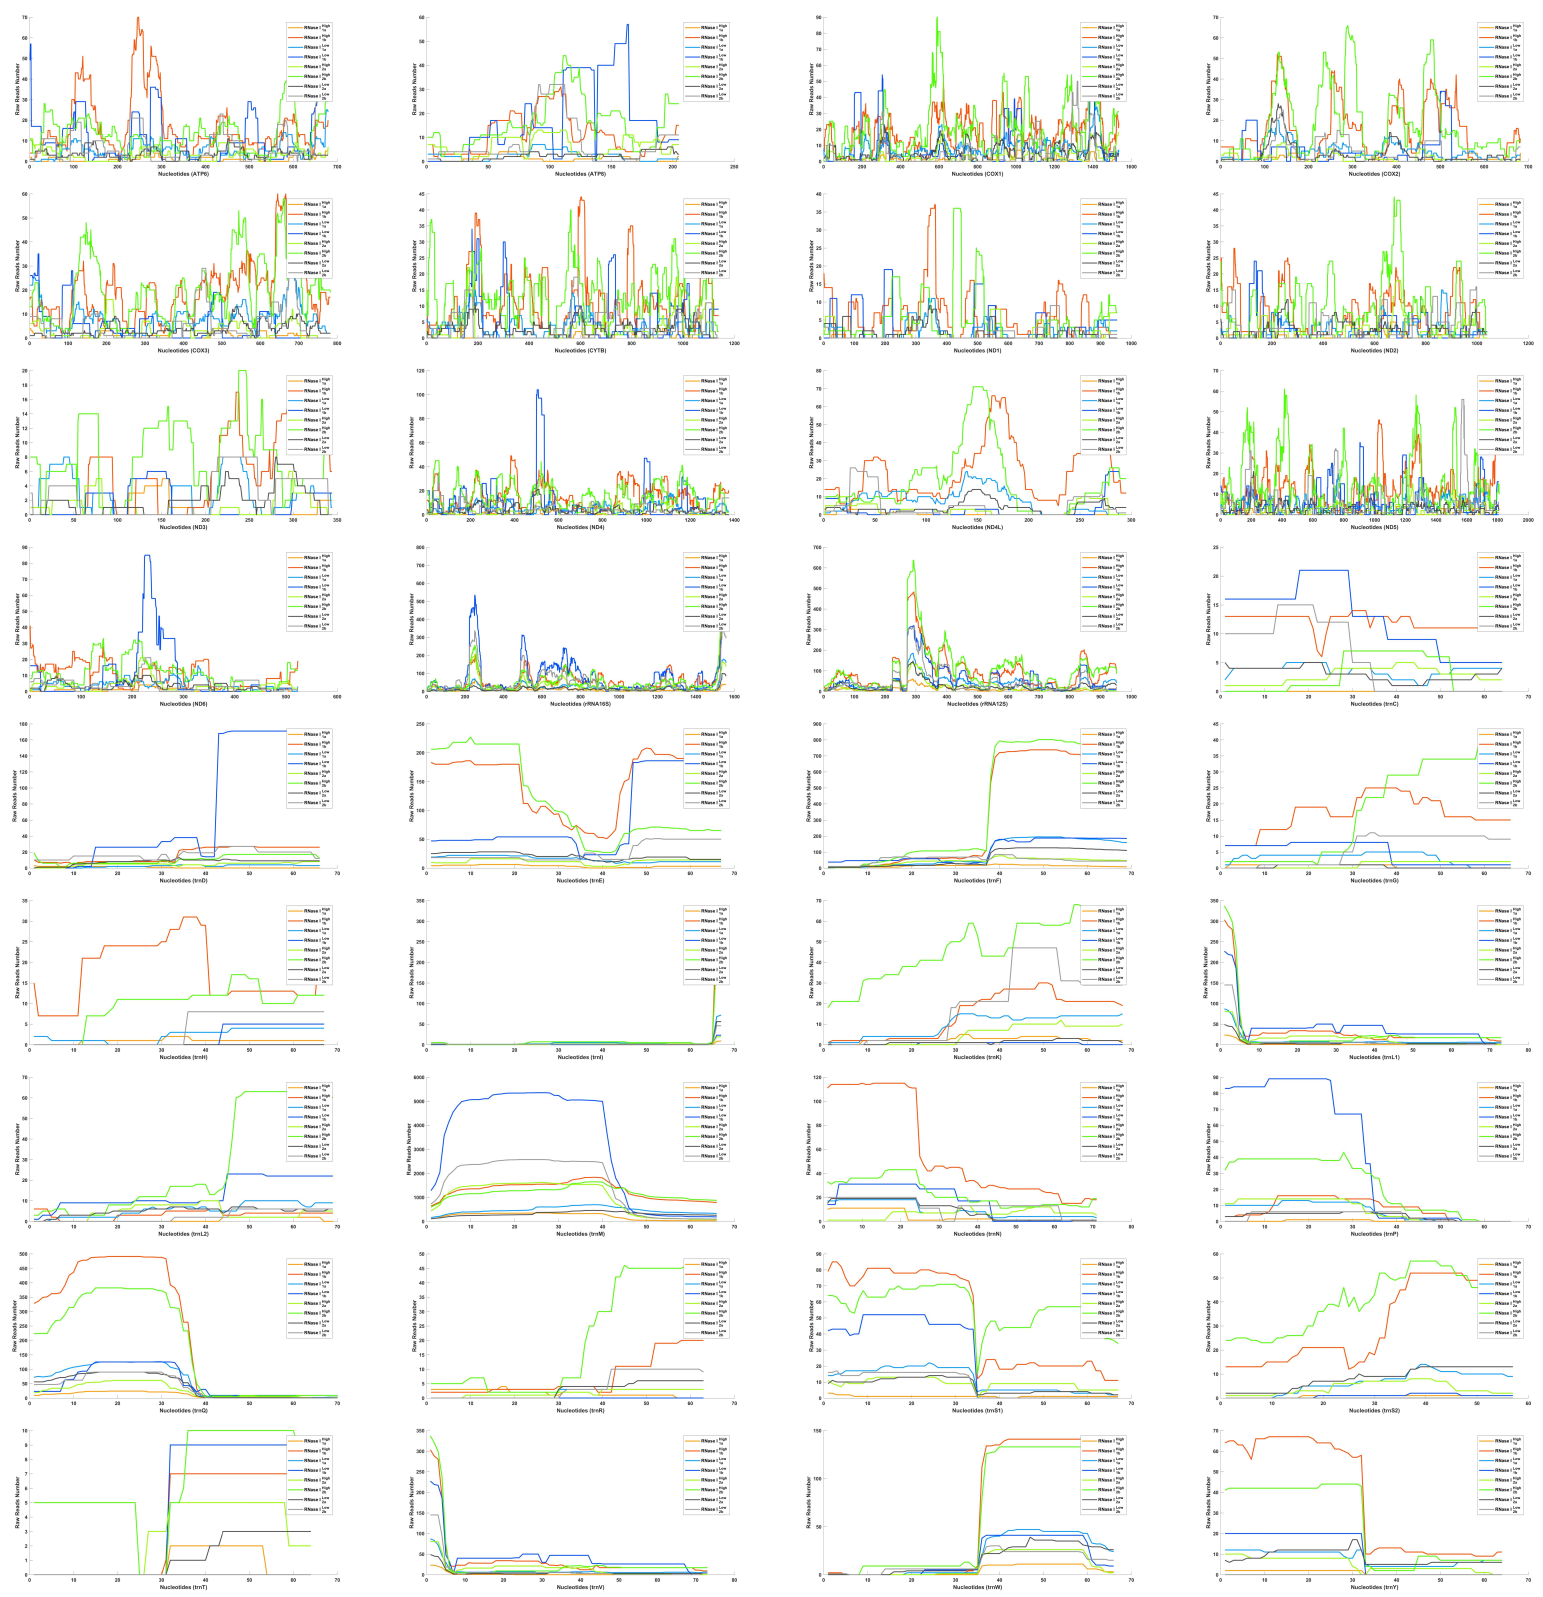

## **Gene-by-gene analysis of Ago2-IP and mock-IP samples**

The **figure S2** highlights the enrichment of Ago2-IP samples compared to IgG-IP samples, across multiple mitochondrial genes.

In the following figure, we show the small RNAs transcriptional signature of all the mitochondrial genes, divided by gene for neuronal progenitors (NP) and teratoma-derived fibroblast (TDF). The genes order is protein-coding, rRNAs, tRNAs, and within each group, the genes are in alphabetic order.



## **Gene-by-gene analysis of HeLa cells with Ago2-IP and without**

The **figure S3** highlights the enrichment in small mitochondrial RNAs of specific genes after Ago2-IP treatment, across multiple mitochondrial genes.

In the following figure, we show the small RNAs transcriptional signature of all the mitochondrial genes, divided by gene. The genes order is protein-coding, rRNAs, tRNAs, and within each group, the genes are in alphabetic order. The samples are paired, thus the samples of each treatment have to be compared to their corresponding number. For example, Input<sub>1</sub> should be compared to Ago2<sup>IP</sup><sub>1</sub> and not to Ago2<sup>IP</sup><sub>2</sub>.



## **Gene-by-gene analysis of mouse embryonic stem cells with Ago2-IP and without**

The **figure S4** highlights the enrichment in small mitochondrial RNAs of specific genes after Ago2-IP treatment, across multiple mitochondrial genes.

In the following figure, we show the small RNAs transcriptional signature of all the mitochondrial genes, divided by gene. The genes order is protein-coding, rRNAs, tRNAs, and within each group, the genes are in alphabetic order. The samples are paired, thus, the samples of each treatment have to be compared to their corresponding number. For example, InputIP<sub>1</sub> should be compared to Ago2<sup>IP</sup><sub>1</sub> and not to Ago2<sup>IP</sup><sub>2</sub>.



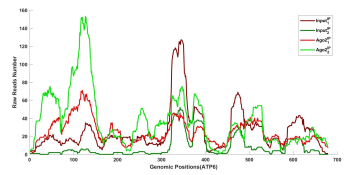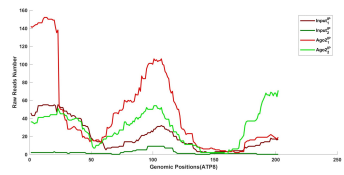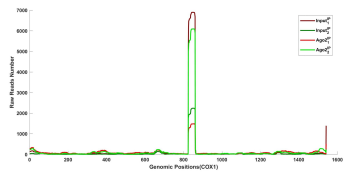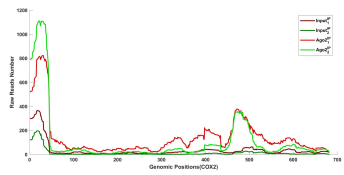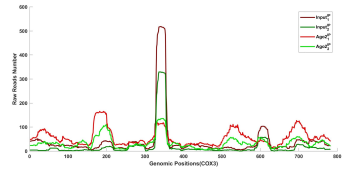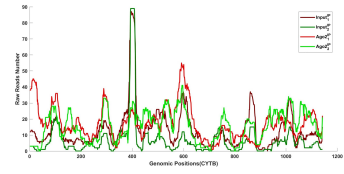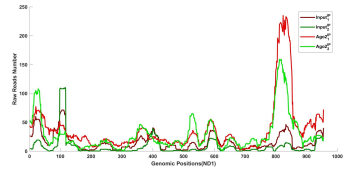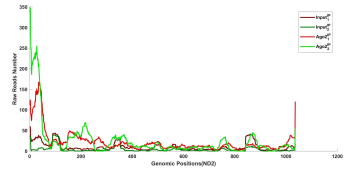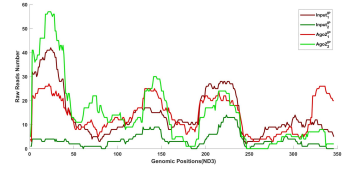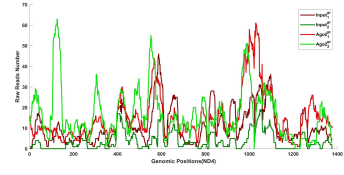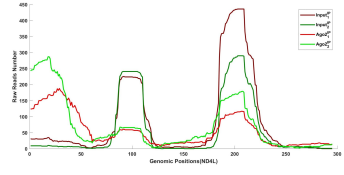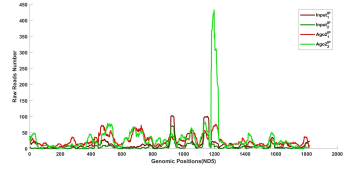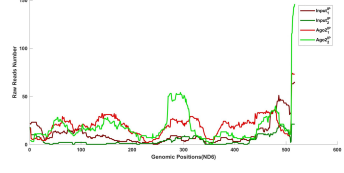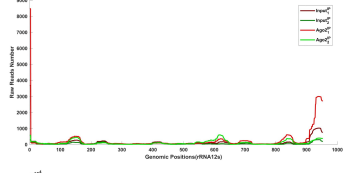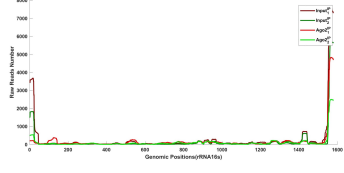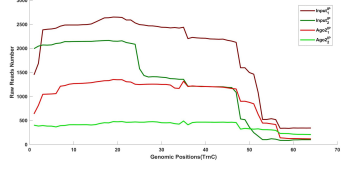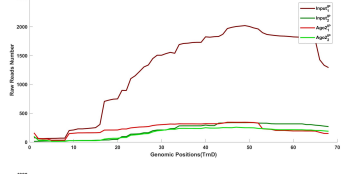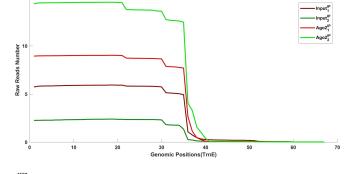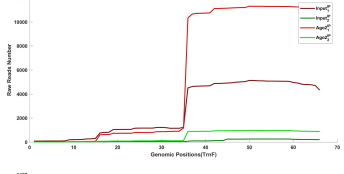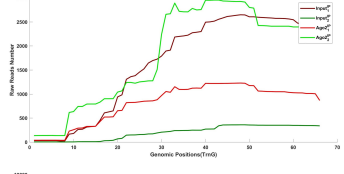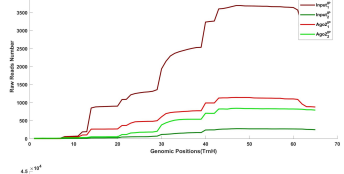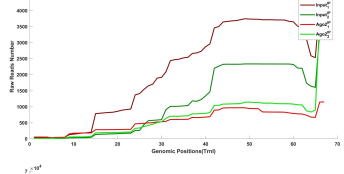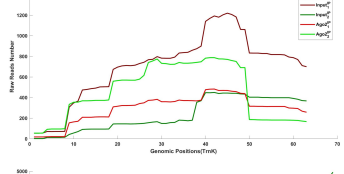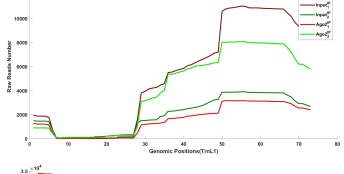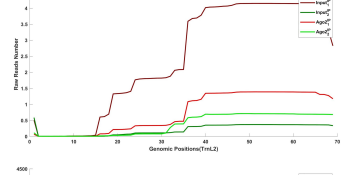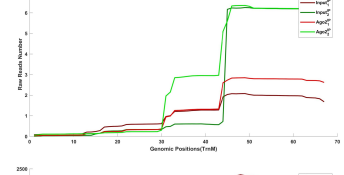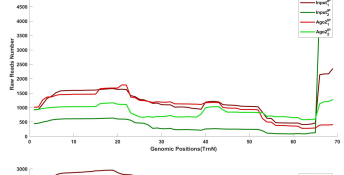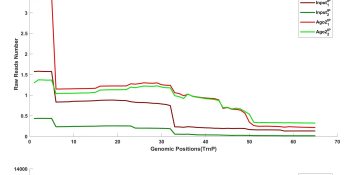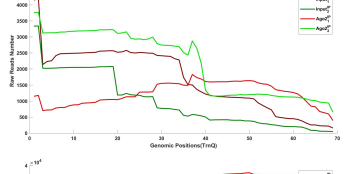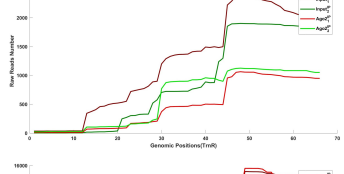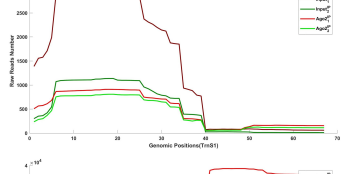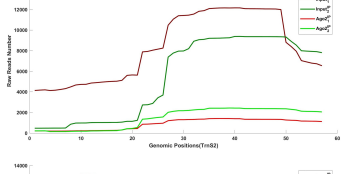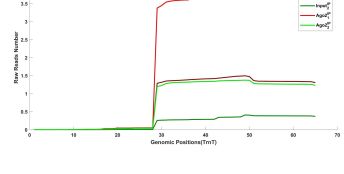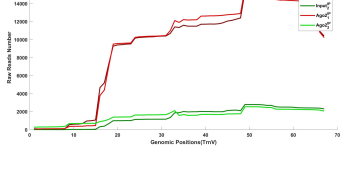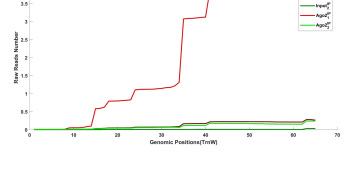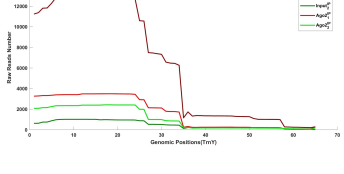

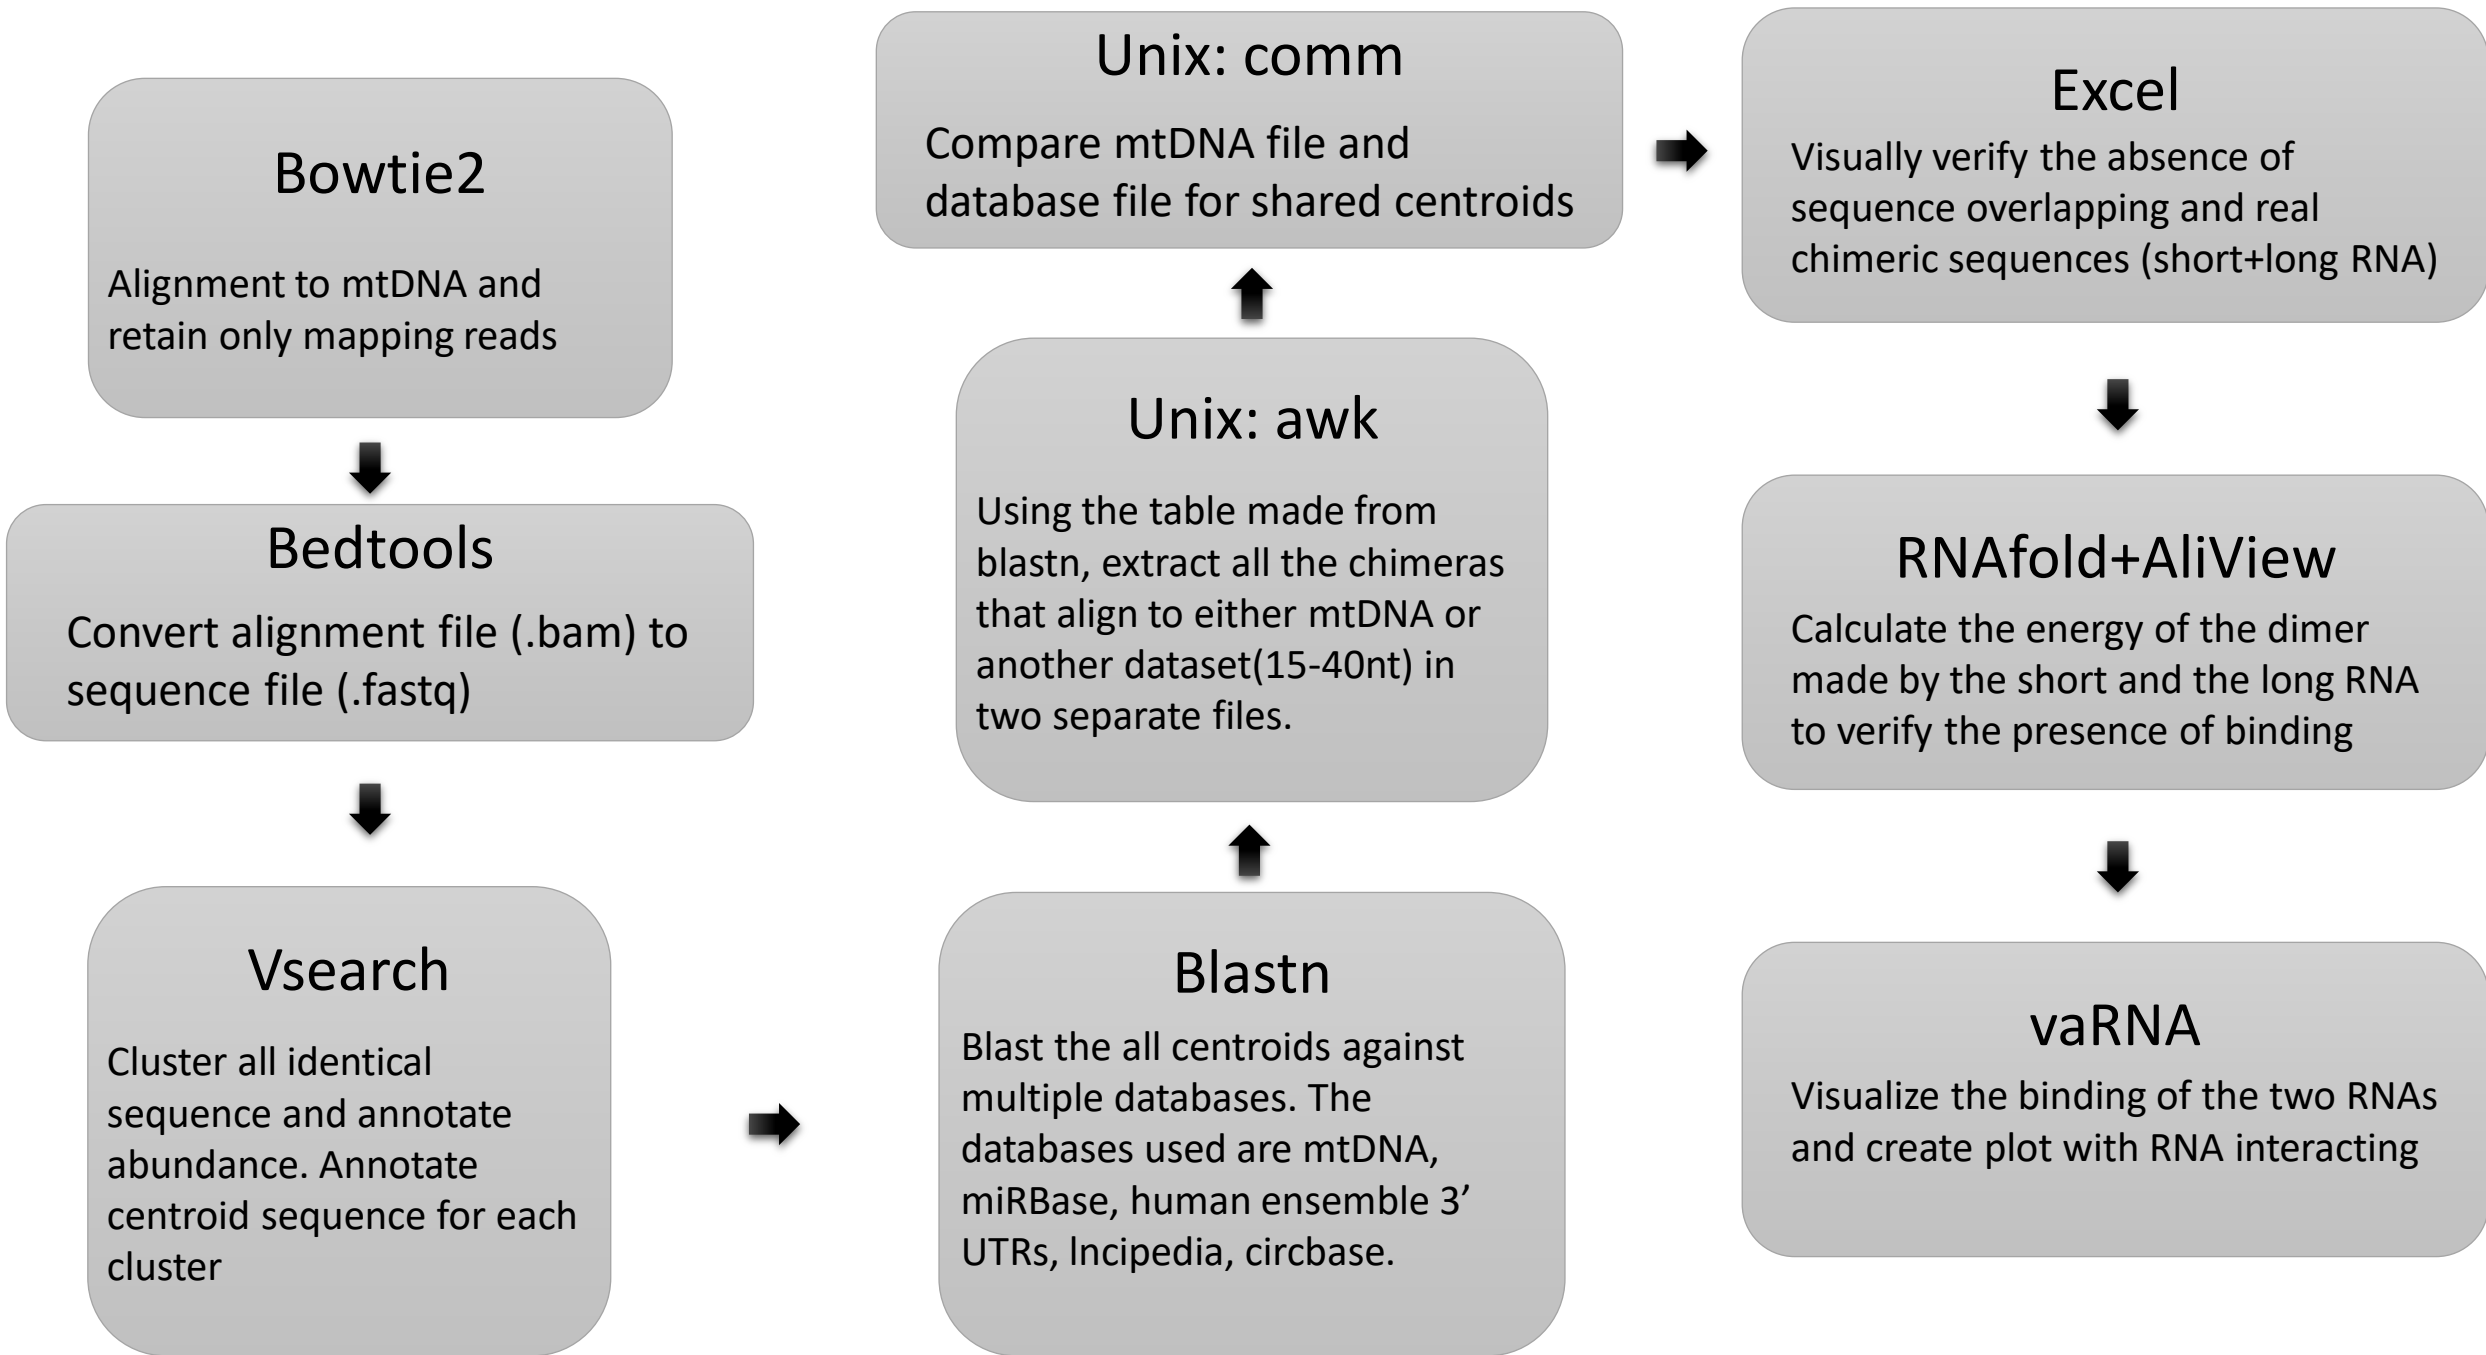

Supplement: evac023_supplementary_data.pdf [file evac023_supplementary_data.pdf]
